# Supplementary material
Source: HighWire-hosted journal article supplement (https://bmjopenquality.bmj.com/highwire/filestream/135892/field_highwire_adjunct_files/0/ds3957.xlsx)
Supplement: ds3957.xlsx [file ds3957.xlsx]

## Sheet: Sheet1
Door To Needle ( DTN) Time
Mean DTN	2012	2013	2014 to August
No. patients	115	138	100
WEEKEND	96.7	69	63.9
WEEKDAY	65.1	54.2	47.4
WEEKDAY after 17:00	81.2	68.2	53.7
WEEKDAY 9-5	55.7	45.2	38.8
AVERAGE	74.7	59.2	51
Median DTN	2012	2013	2014
WEEKEND	92	62	61
WEEKDAY	55	47	42
WEEKDAY after 17:00	65	58	59
WEEKDAY 9-5	50	40	34
2014 to August		Onset to Arrival	Arrival to CT	Door to Needle	Onset to Needle
Mean
telemedicine		95.5	18.8	68.9	164.4
A&E		100.9	23.6	61	161.9
Stroke team		68.6	19.1	36.5	106.9
Median
telemedicine		86	15	63	145
A&E		79	21	59	158
Stroke team		70	17	33	100
CTP		99	24	50	163
MEDIAN		Onset to Door	Door to Scan	Door to Needle	Onset to Needle
2012	WEEKEND	87	30	92	195
n=115	Weekday after 17:00	78	30	65	153
	Weekday 900-1700	70	19	50	130
	WEEKDAY	71	21	55	137
2013	WEEKEND	74	23	61	129
n=138	Weekday after 17:00	75	19	59	160
	Weekday 900-1700	90	17	40	135
	WEEKDAY	79	17	47	143
2014	WEEKEND	76	25	61	142
n=100 (to Aug)	Weekday after 1700	72	19	60	148
	Weekday 9-5	75	17	34	101
	WEEKDAY	75	17	42	118
